# Supplementary material
Source: ML conference proceedings conference paper supplement (https://openaccess.thecvf.com/content/cvpr_2017/html/Cui_HSfM_Hybrid_Structure-from-Motion_2017_CVPR_paper.html)
Supplement: Supplementary file 1 [file Cui_HSfM_Hybrid_Structure-from-Motion_2017_CVPR_supplemental.pdf]

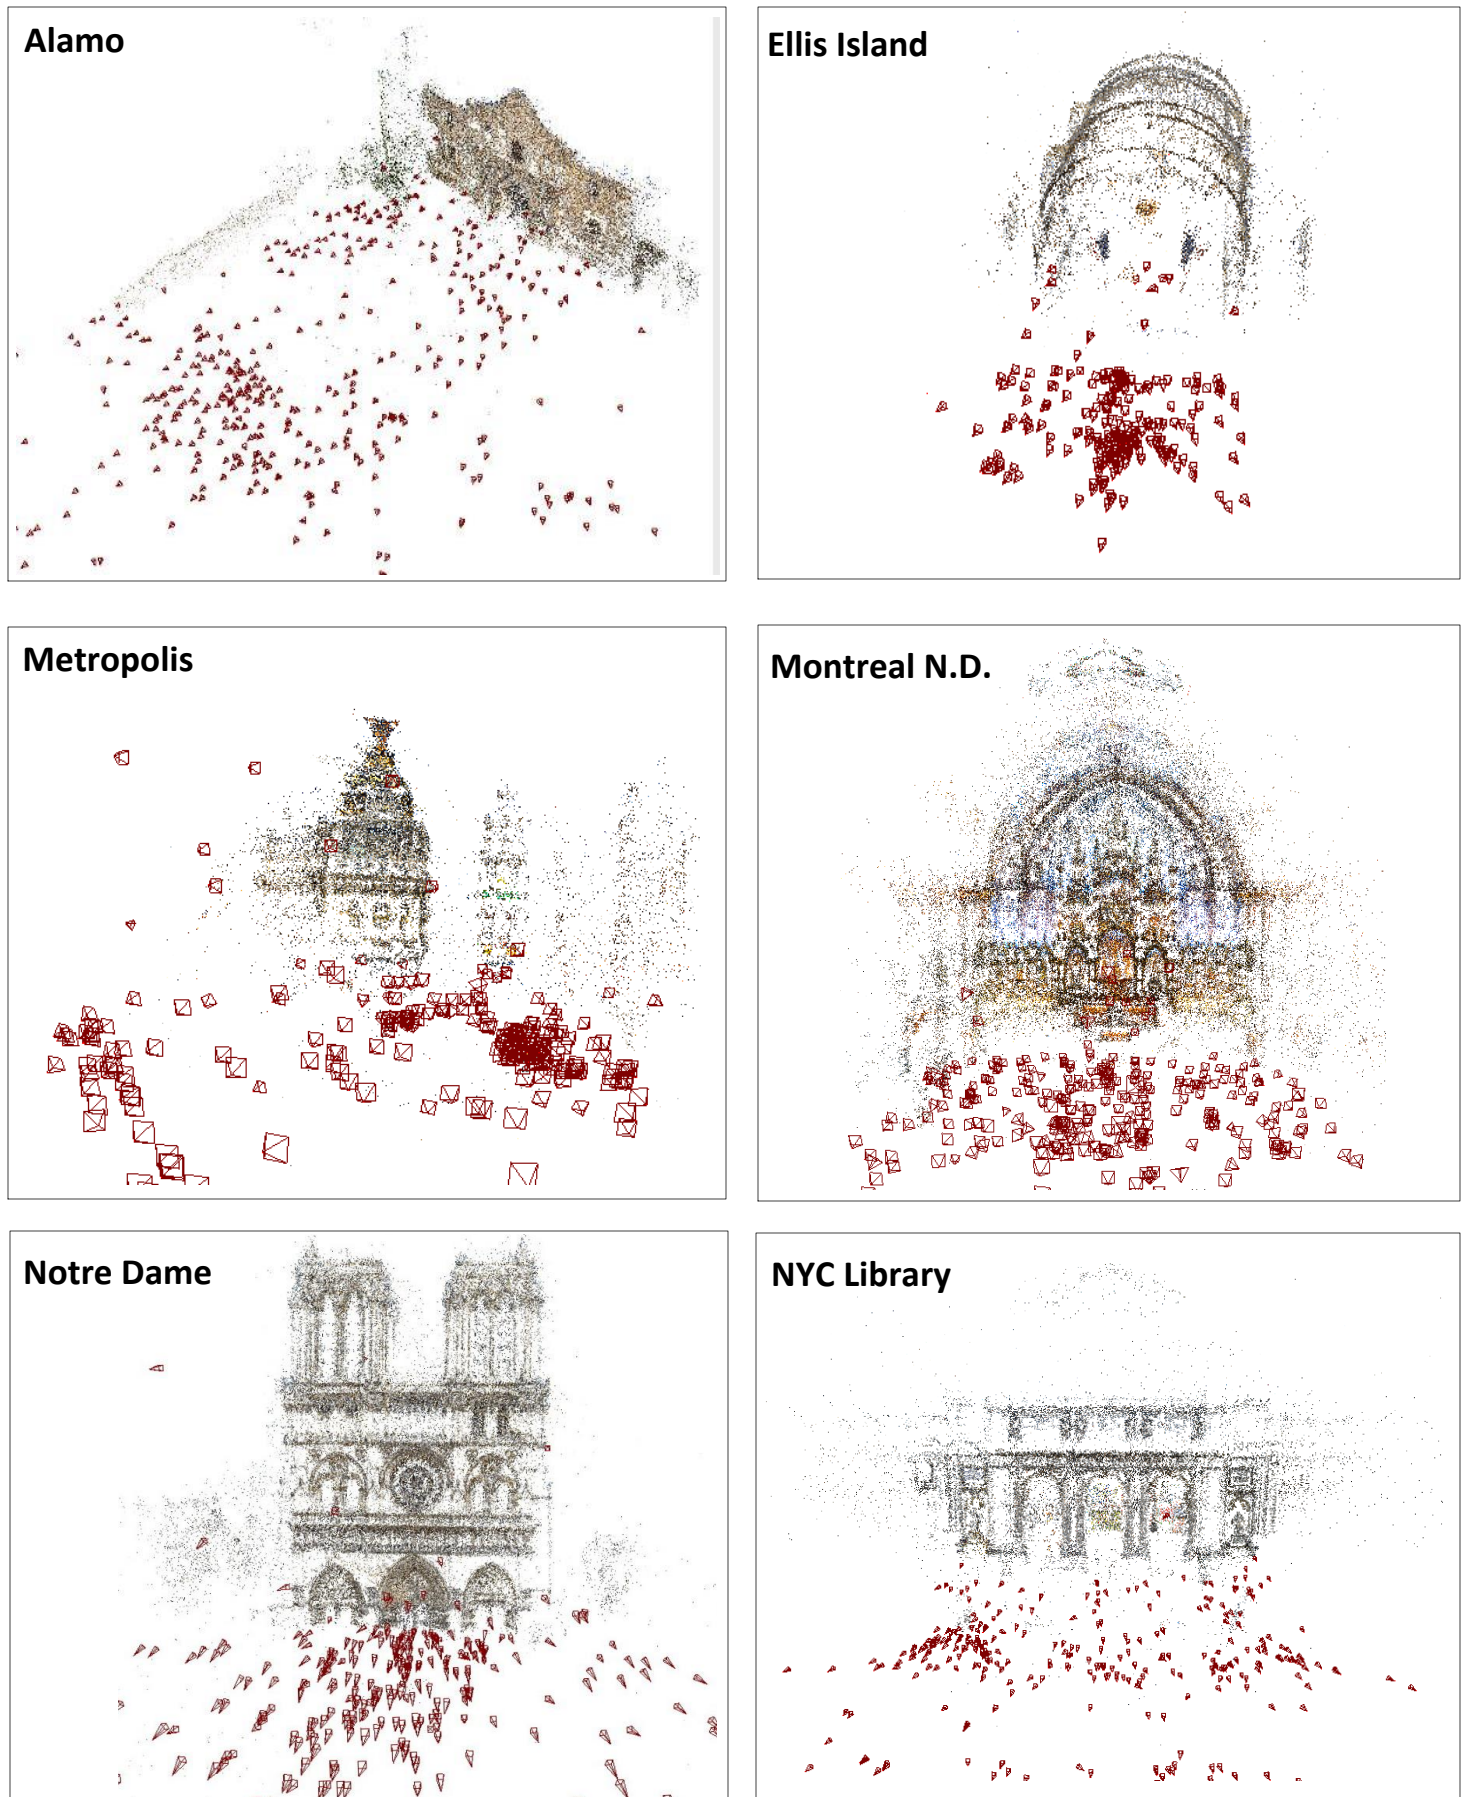

**Figure 1. Reconstruction results on unordered images**

**Piazza del Popolo**

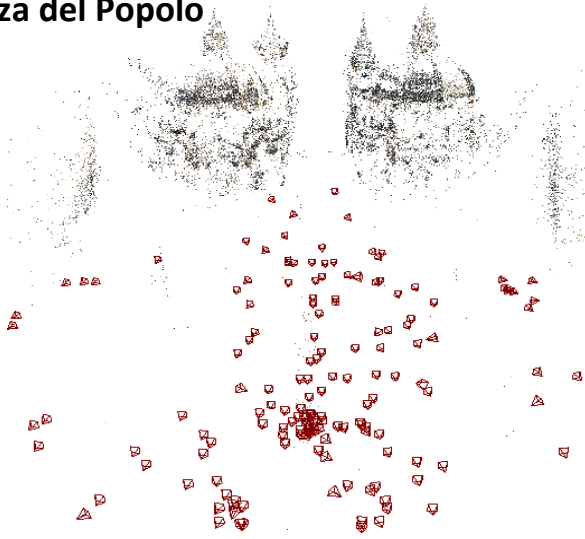

**Roman Forum**

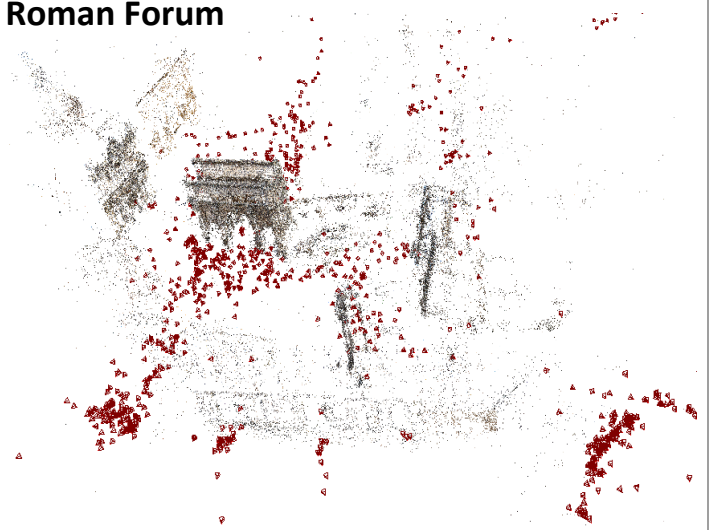

**Tower of London**

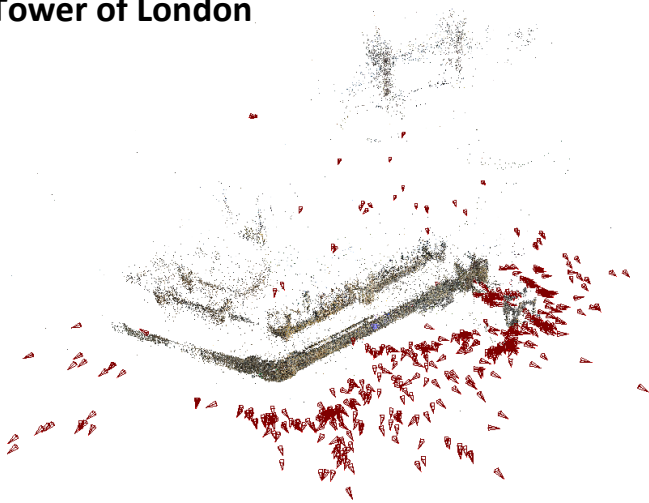

**Union Square**

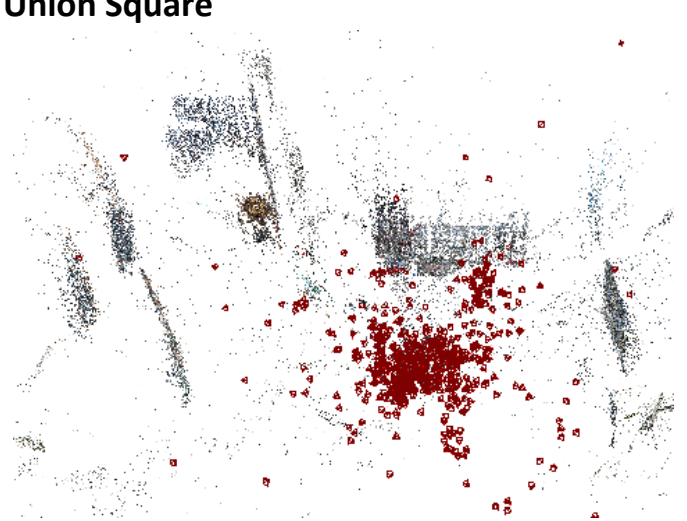

**Yorkminster**

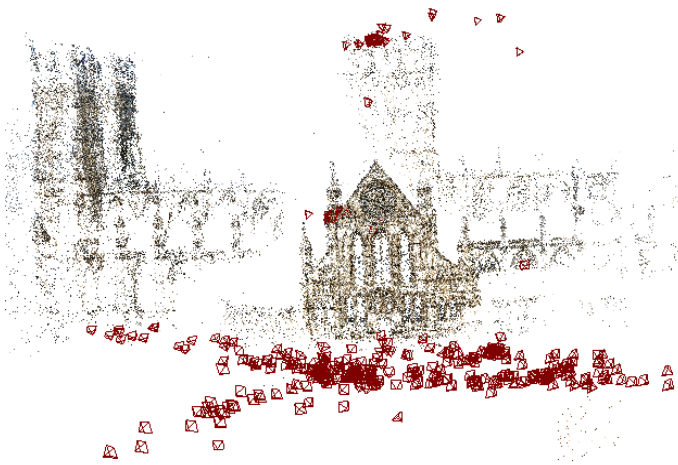

**Vienna Cathedral**

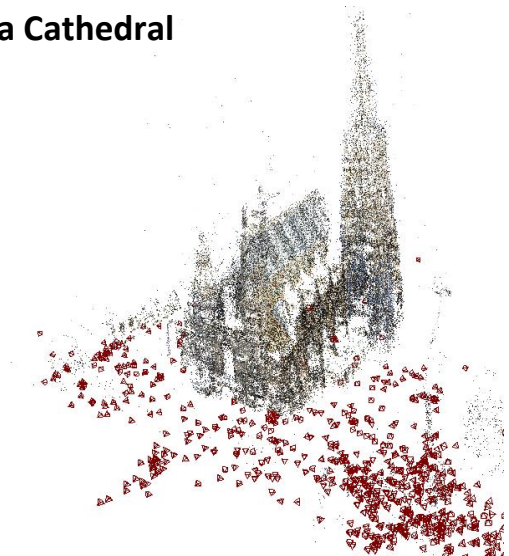

**Figure 2. Reconstruction results on unordered images**



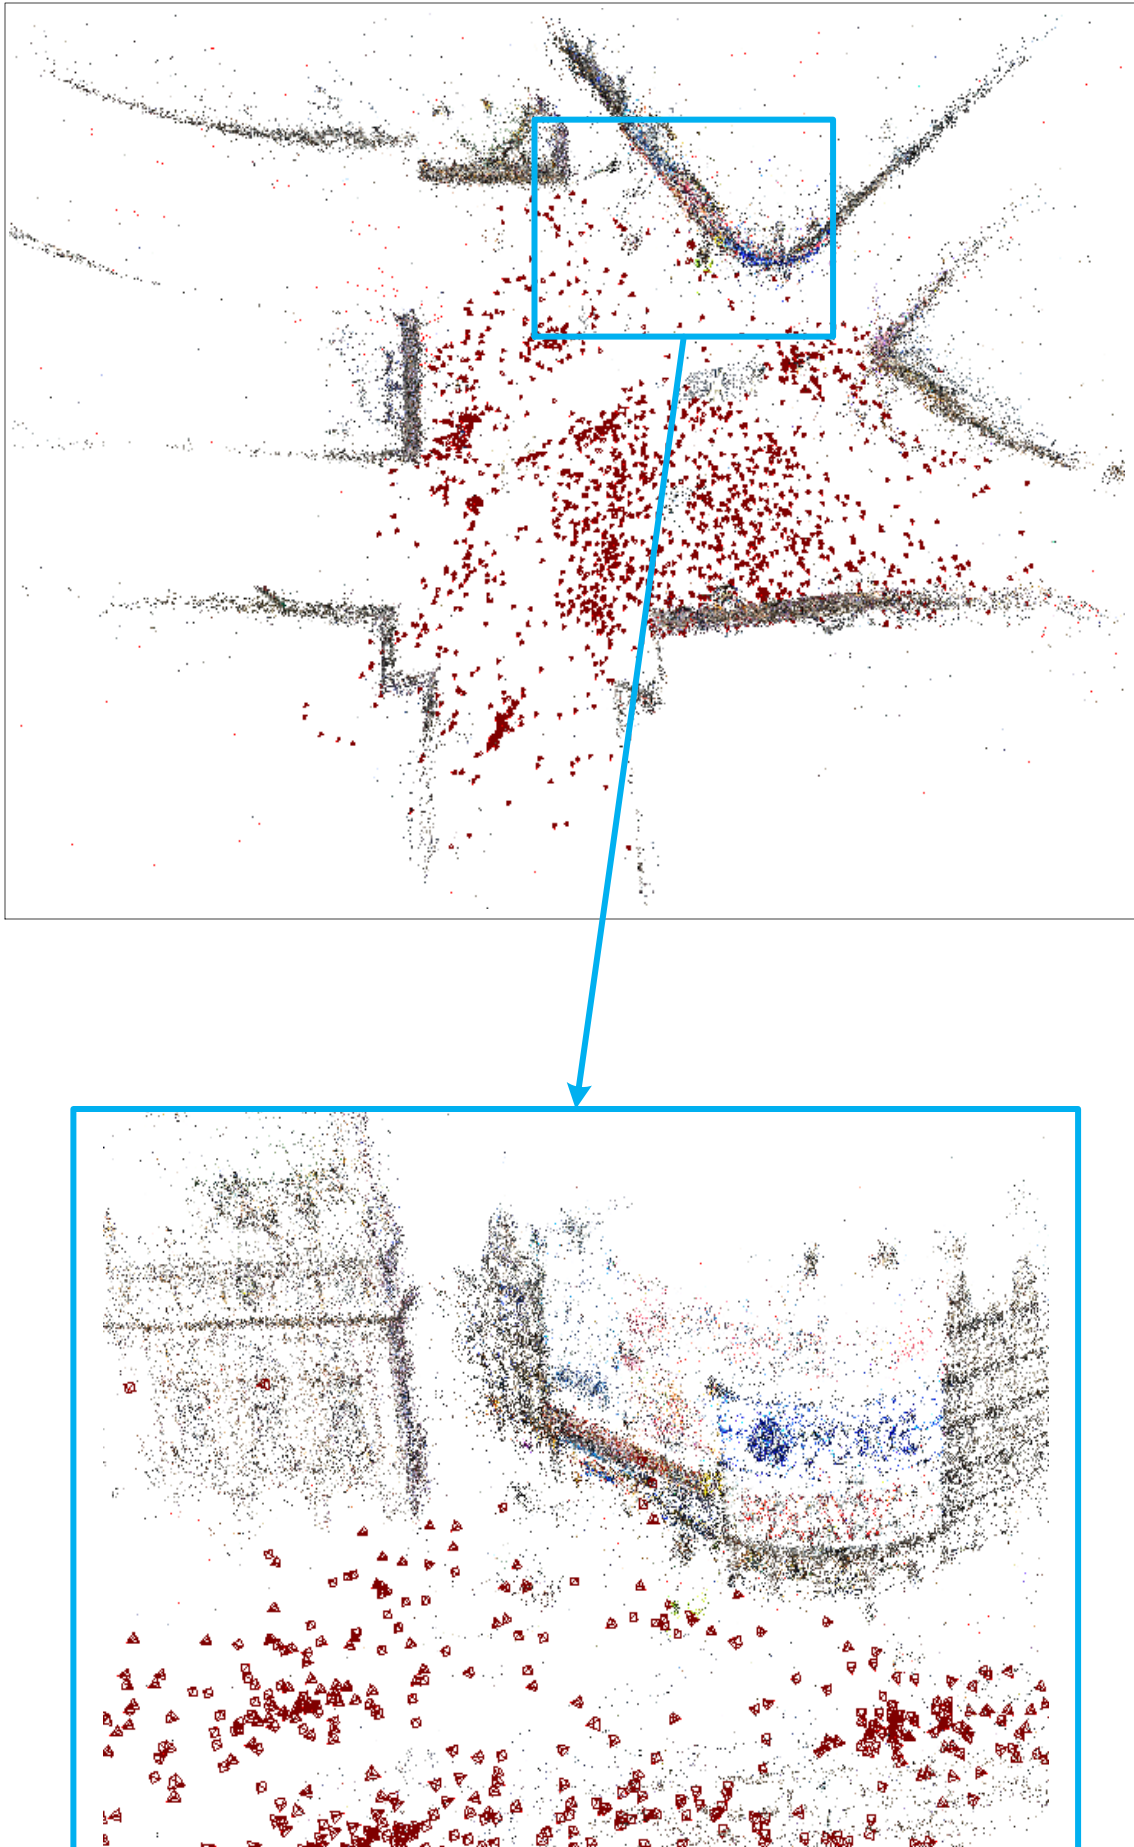

**Figure 3. Reconstruction result on Piccadilly with 2300 images**

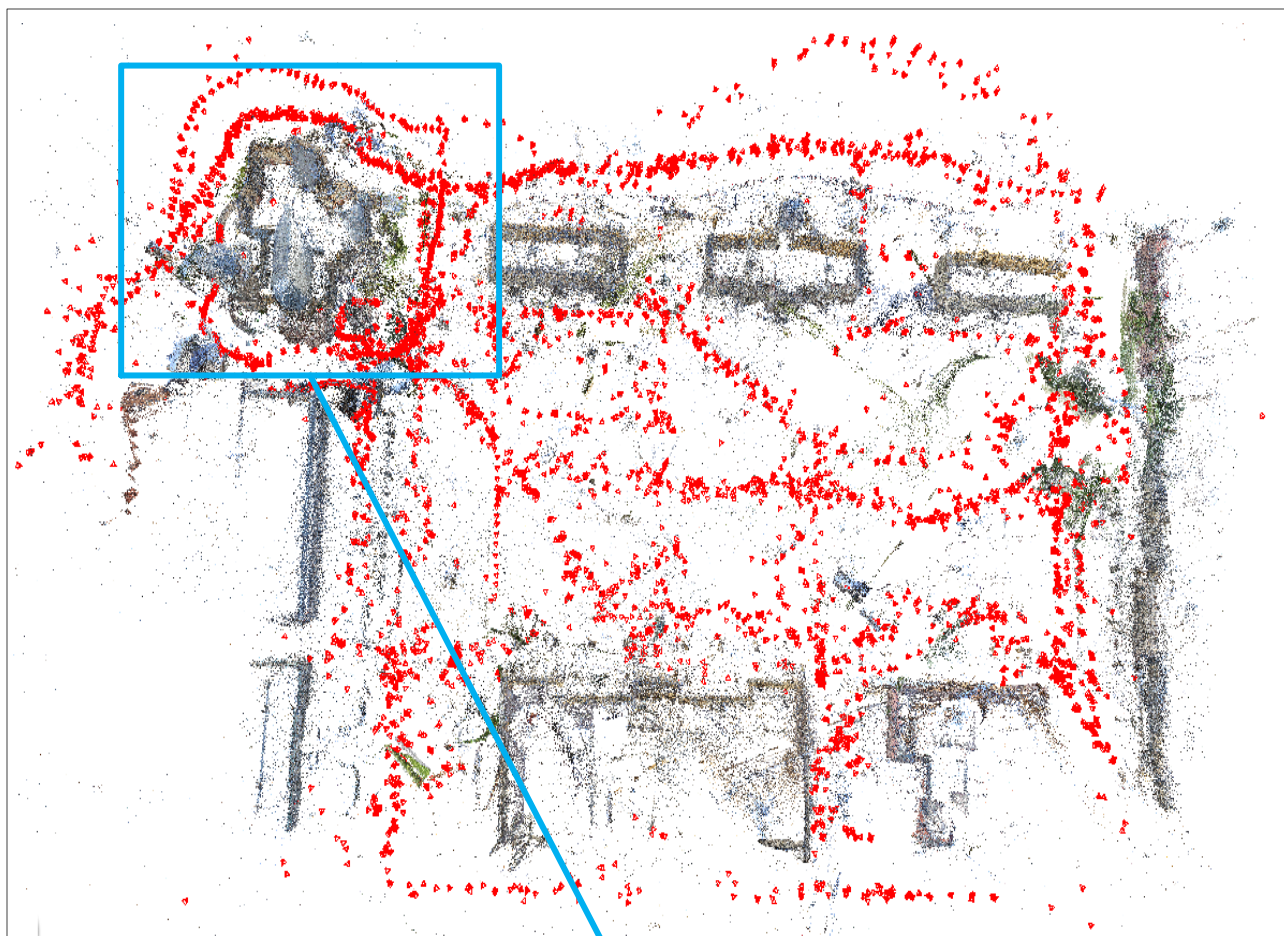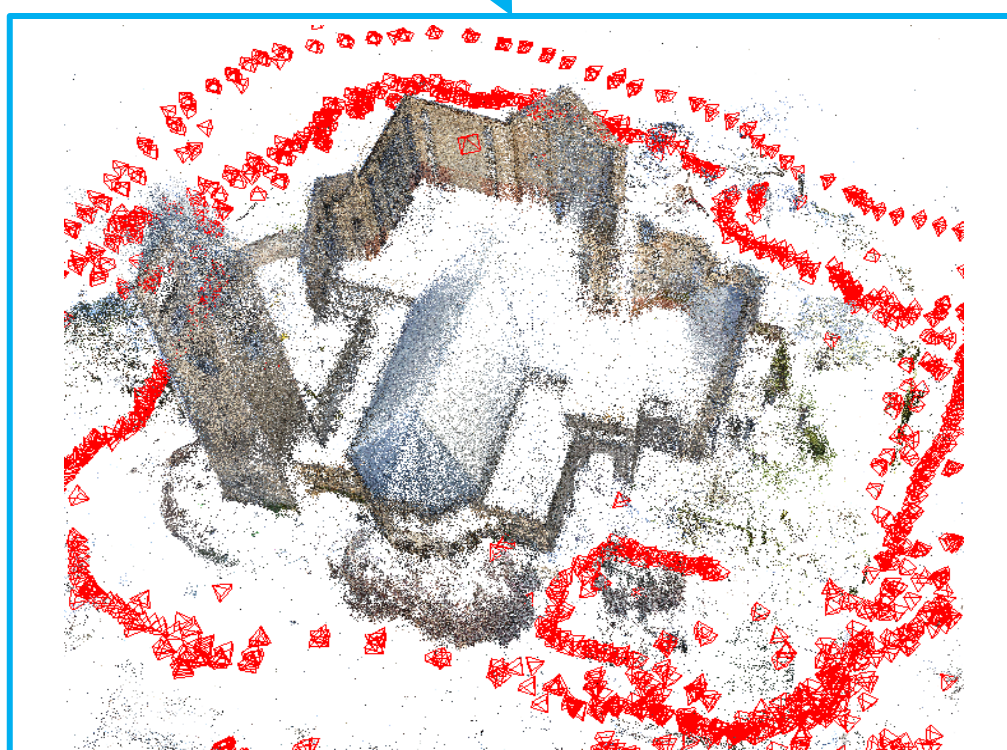

**Figure 4. Reconstruction result on Quad with 5261 images**



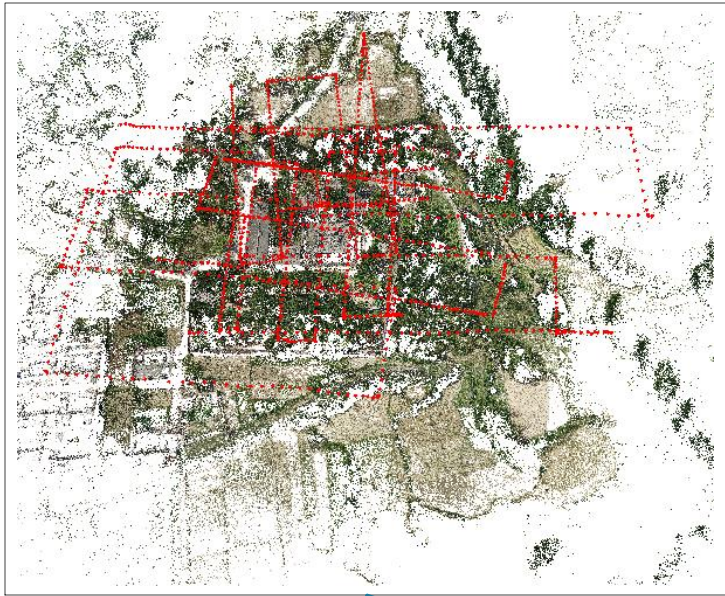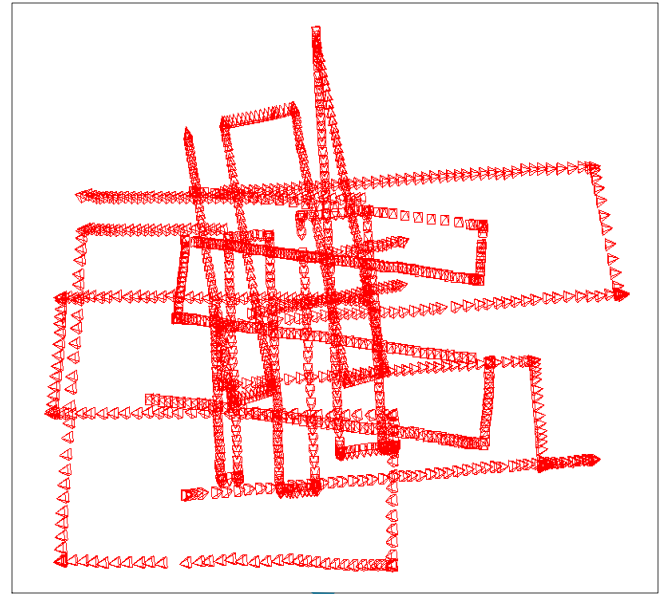

**Camera Poses**

**3D Scene Points**

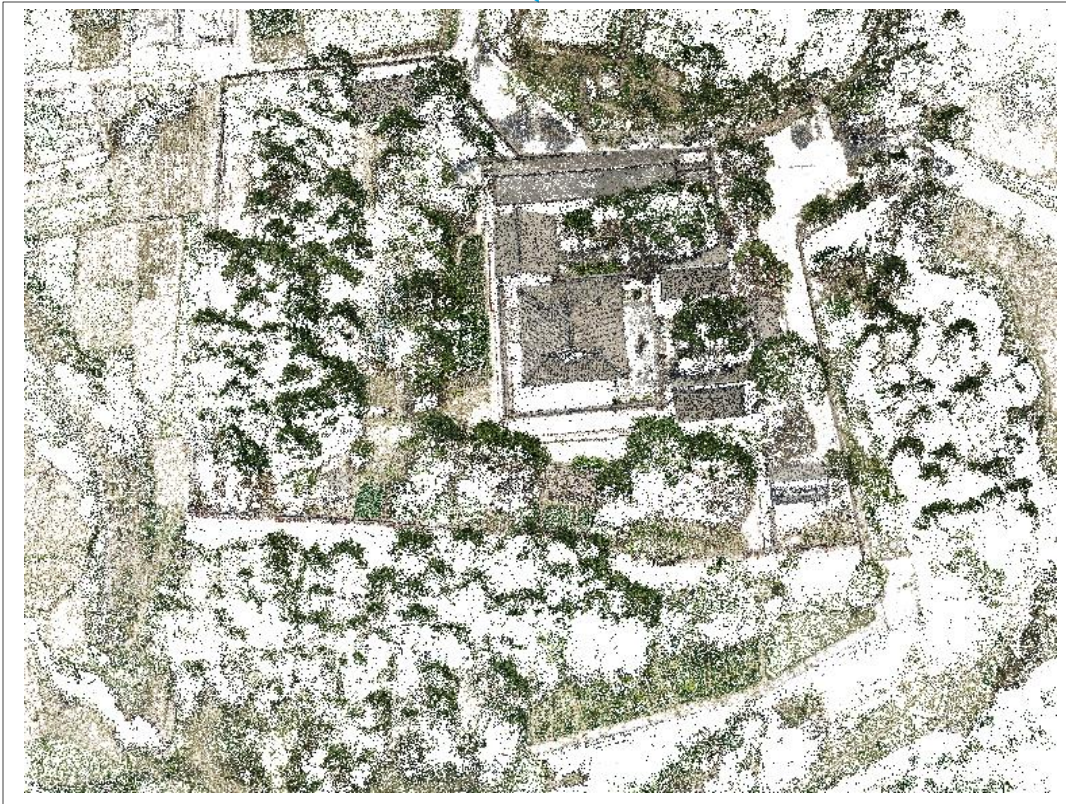

**Figure 5. Reconstruction result on 1429 UAV (Unmanned Aerial Vehicle) images**



**Initial Pair**

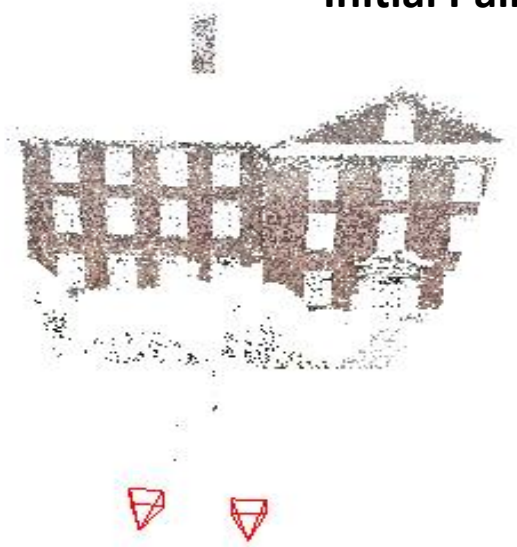

**1<sup>st</sup> iteration**

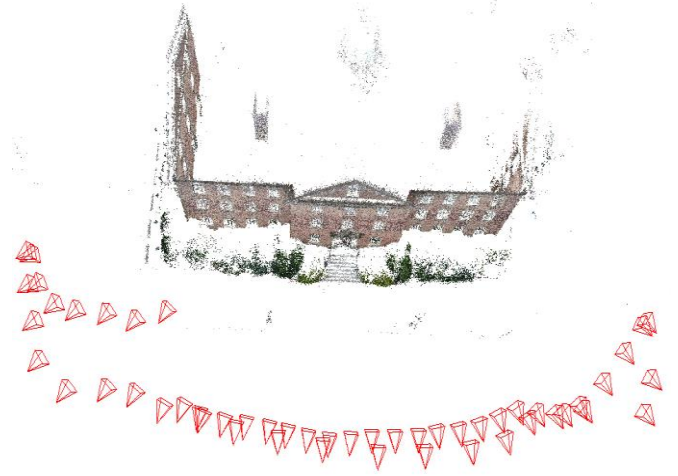

**2<sup>nd</sup> iteration**

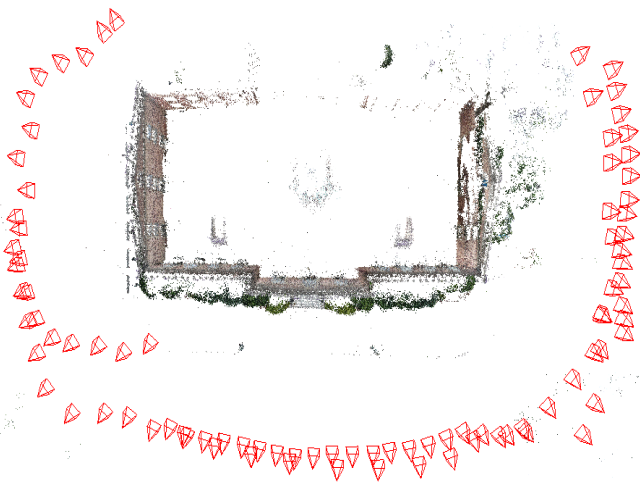

**3<sup>rd</sup> iteration**

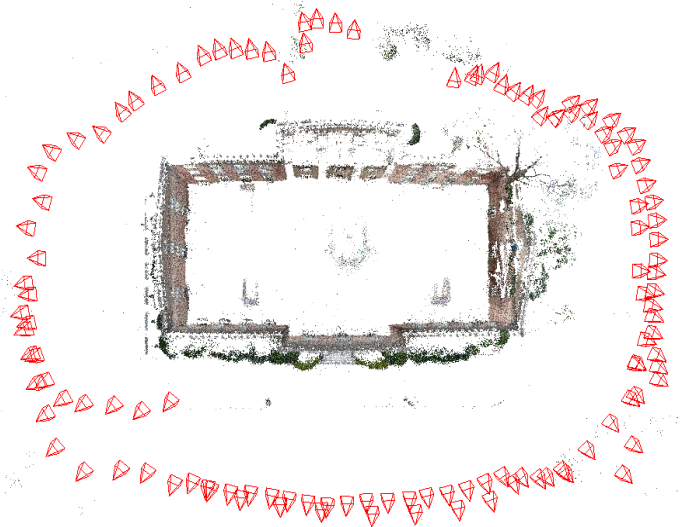

**4<sup>th</sup> iteration**

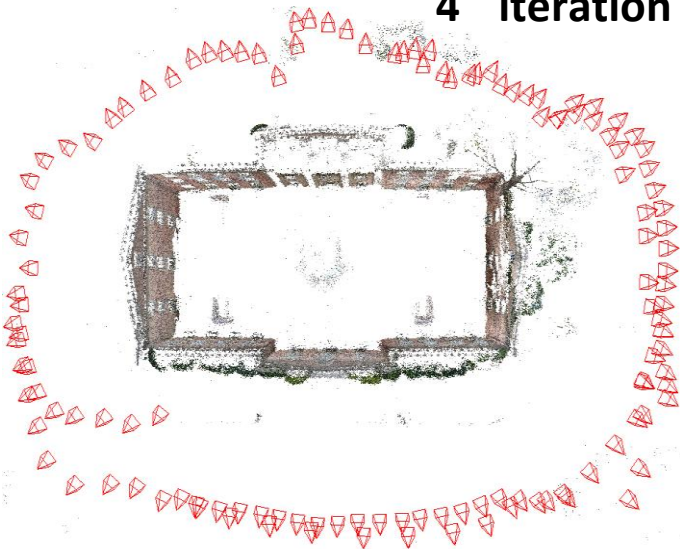

**Final BA**

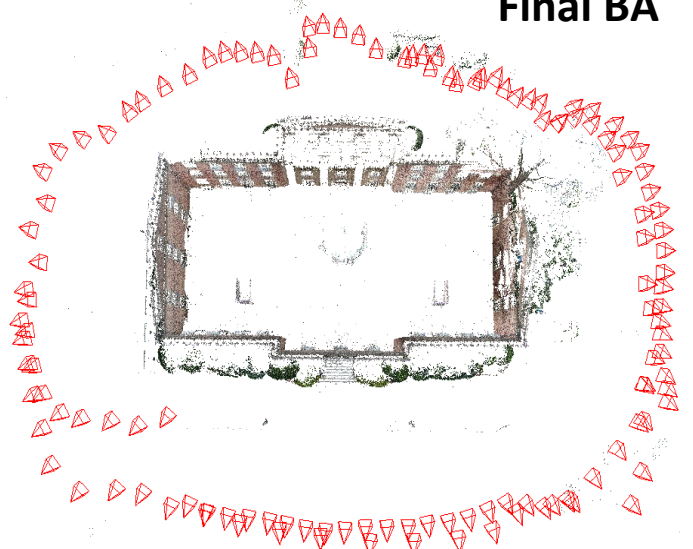

**Figure 6** An illustration of the image adding process on dataset Building.
